# Supplementary material
Source: PubMed Central journal article supplement (PMC8187475)
Supplement: NIHMS1644108-supplement-1.pdf [file NIHMS1644108-supplement-1.pdf]

| Supplemental Table: SSRT – fractional anisotropy relationships. Regression coefficients from models with dependent variable SSRT for the three groups together and separately. All models include relevant FA value, age, and gender as predictors.                                                                                                                                                          |                        |              |            |                    |              |             |
|--------------------------------------------------------------------------------------------------------------------------------------------------------------------------------------------------------------------------------------------------------------------------------------------------------------------------------------------------------------------------------------------------------------|------------------------|--------------|------------|--------------------|--------------|-------------|
| N = 58                                                                                                                                                                                                                                                                                                                                                                                                       |                        | B            |            |                    | $\beta$      | p           |
|                                                                                                                                                                                                                                                                                                                                                                                                              |                        | Mean         | SE         | CI                 |              |             |
| r-IFC                                                                                                                                                                                                                                                                                                                                                                                                        | Total (n=58)           | -295         | 166        | -628, 38           | -.227        | .081        |
|                                                                                                                                                                                                                                                                                                                                                                                                              | <sup>a</sup> HC (n=19) | <b>-1301</b> | <b>332</b> | <b>-2006, -594</b> | <b>-.670</b> | <b>.001</b> |
|                                                                                                                                                                                                                                                                                                                                                                                                              | PD-noFOG (n=18)        | 332          | 306        | -324, 989          | .231         | .296        |
|                                                                                                                                                                                                                                                                                                                                                                                                              | PD-FOG (n=21)          | -312         | 298        | -941, 317          | -.242        | .310        |
| r-preSMA                                                                                                                                                                                                                                                                                                                                                                                                     | Total                  | -291         | 181        | -654, 71           | -.210        | .113        |
|                                                                                                                                                                                                                                                                                                                                                                                                              | <sup>b</sup> HC        | <b>-495</b>  | <b>189</b> | <b>-898, -92</b>   | <b>-.524</b> | <b>.019</b> |
|                                                                                                                                                                                                                                                                                                                                                                                                              | PD-noFOG               | 550          | 345        | -189, 1289         | .355         | .133        |
|                                                                                                                                                                                                                                                                                                                                                                                                              | PD-FOG                 | -372         | 422        | -1263, 518         | -.194        | .390        |
| r-STN                                                                                                                                                                                                                                                                                                                                                                                                        | Total                  | -212         | 152        | -516, 91           | -.181        | .167        |
|                                                                                                                                                                                                                                                                                                                                                                                                              | <sup>c</sup> HC        | <b>-495</b>  | <b>162</b> | <b>-840, -151</b>  | <b>-.585</b> | <b>.008</b> |
|                                                                                                                                                                                                                                                                                                                                                                                                              | PD-noFOG               | 427          | 240        | -88, 941           | .384         | .097        |
|                                                                                                                                                                                                                                                                                                                                                                                                              | PD-FOG                 | -174         | 377        | -970, 621          | -.107        | .649        |
| l-IFC                                                                                                                                                                                                                                                                                                                                                                                                        | Total                  | -200         | 172        | -545, 146          | -.154        | .251        |
|                                                                                                                                                                                                                                                                                                                                                                                                              | HC                     | -399         | 223        | -873, 75           | -.459        | .093        |
|                                                                                                                                                                                                                                                                                                                                                                                                              | PD-noFOG               | 319          | 715        | -1215,             | .112         | .663        |
|                                                                                                                                                                                                                                                                                                                                                                                                              | PD-FOG                 | 766          | 466        | -217, 1749         | .392         | .119        |
| l-preSMA                                                                                                                                                                                                                                                                                                                                                                                                     | <sup>d</sup> Total     | <b>-376</b>  | <b>174</b> | <b>-724, -28</b>   | <b>-.272</b> | <b>.035</b> |
|                                                                                                                                                                                                                                                                                                                                                                                                              | HC                     | -467         | 222        | -940, 6            | -.518        | .053        |
|                                                                                                                                                                                                                                                                                                                                                                                                              | PD-noFOG               | -245         | 959        | -2302,             | -.070        | .802        |
|                                                                                                                                                                                                                                                                                                                                                                                                              | PD-FOG                 | -601         | 1131       | -2987,             | -.123        | .602        |
| l-STN                                                                                                                                                                                                                                                                                                                                                                                                        | Total                  | -201         | 174        | -550, 148          | -.154        | .252        |
|                                                                                                                                                                                                                                                                                                                                                                                                              | HC                     | -247         | 221        | -717, 223          | -.292        | .280        |
|                                                                                                                                                                                                                                                                                                                                                                                                              | PD-noFOG               | 459          | 586        | -798, 1715         | .174         | .447        |
|                                                                                                                                                                                                                                                                                                                                                                                                              | PD-FOG                 | 278          | 444        | -659, 1214         | .152         | .540        |
| <sup>a</sup> p=0.064 (mean[CI] of B:-898 [-1857,61]) after removal of 1 high-leverage data point<br><sup>b</sup> p=0.044 (mean[CI] of B:-336 [-661,-11]) after removal of 1 high-leverage data point<br><sup>c</sup> p=0.079 (mean[CI] of B:-324 [-690,43]) after removal of 1 high-leverage data point<br><sup>d</sup> p=0.035 (mean[CI] of B:-397 [-738, -56]) after removal of 1 high-leverage data point |                        |              |            |                    |              |             |
